# Supplementary material for: Mapping the Salt Stress-Induced Changes in the Root miRNome in Pokkali Rice
Source: MDPI journal article supplement (doi:10.3390/biom10040498), 2020-03-25
Supplement: s1 [file s1]

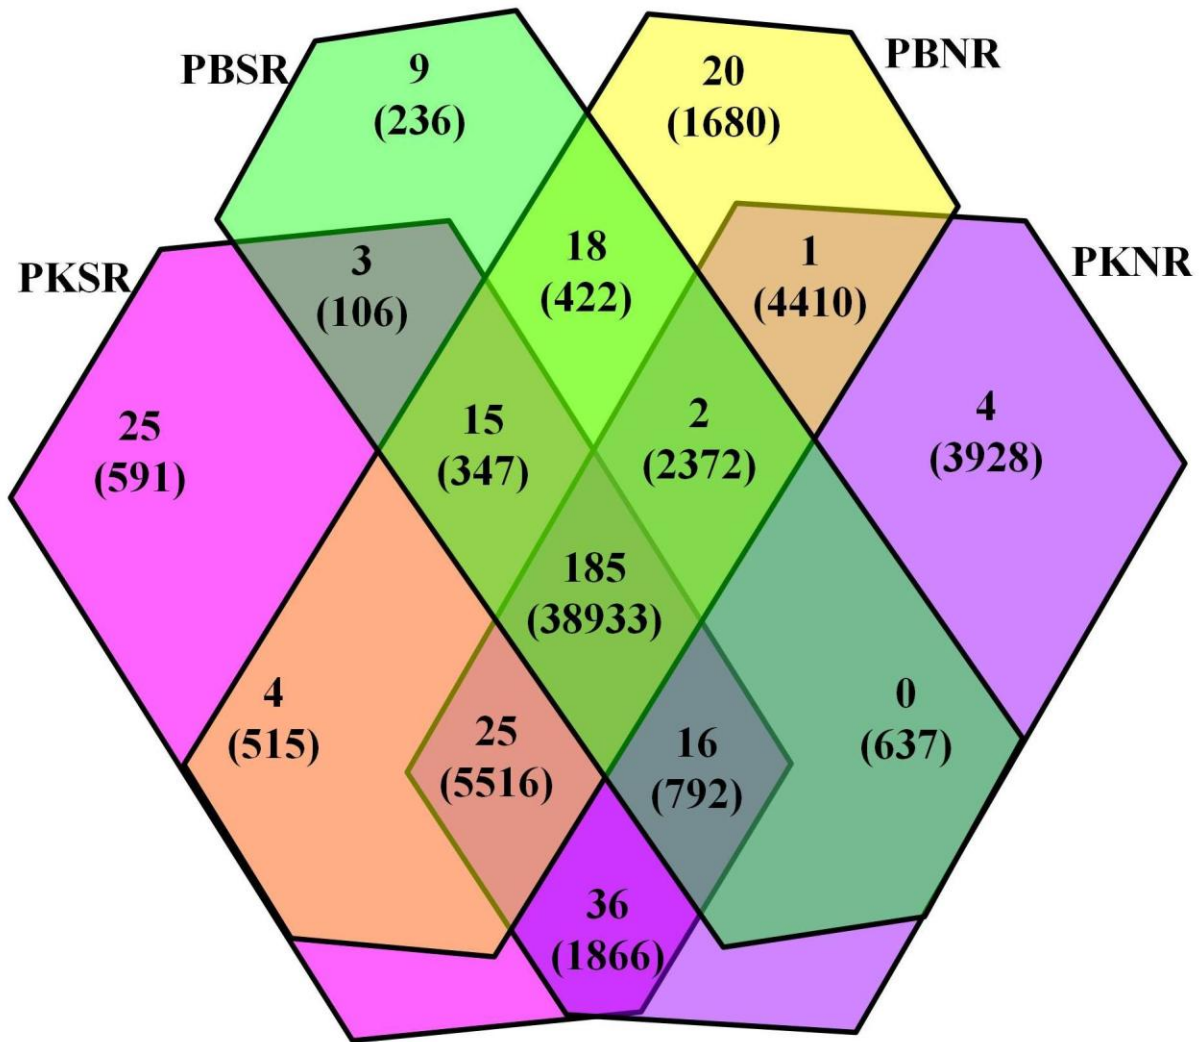

**Supplementary-File 1A:** Venn diagram representing the distribution of: miRs: mRNA transcript (within bracket) across the 4 root libraries under control and experimental conditions in Pusa Basmati (PBNR, PBSR) and Pokkali (PKNR, PKSR).

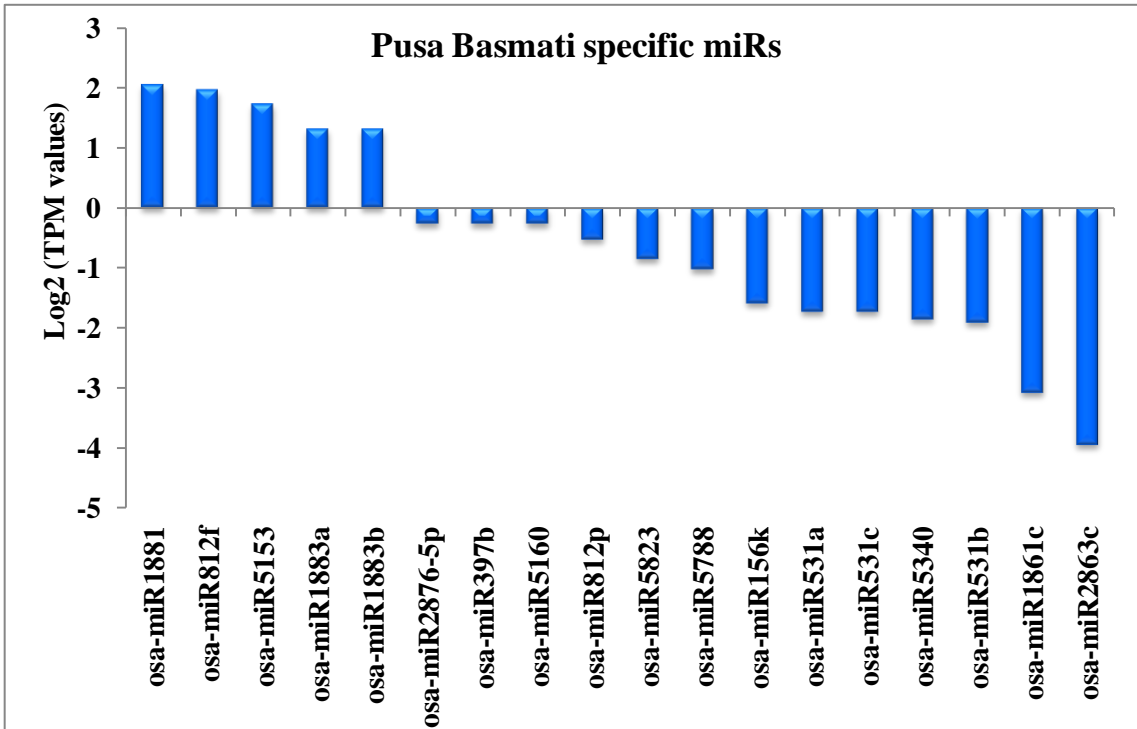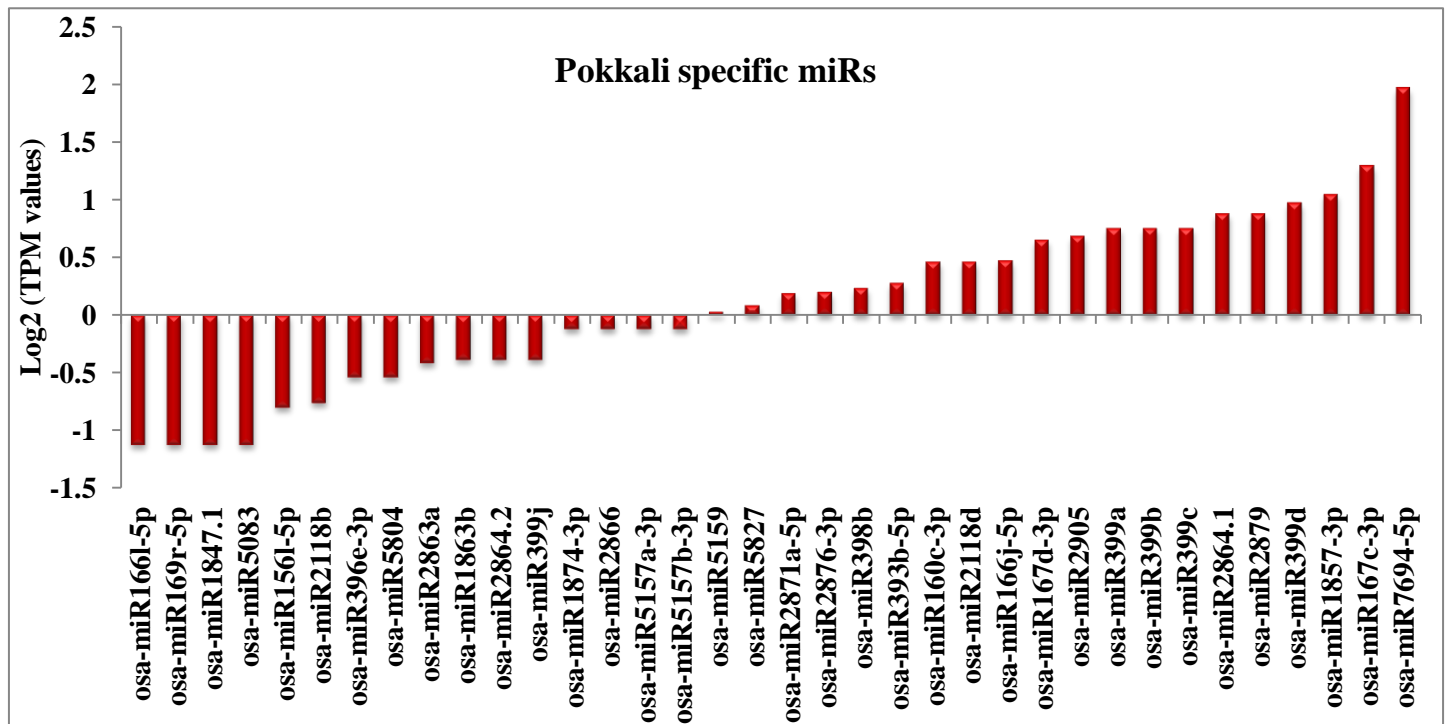

**Supplementary-File 1B:** Graphical representation of specific miRs: Differential miRs expression profiling of: (A) miRNAs specifically expressed miRs in PB root tissues (B) miRNAs specifically expressed miRs in PK root tissues

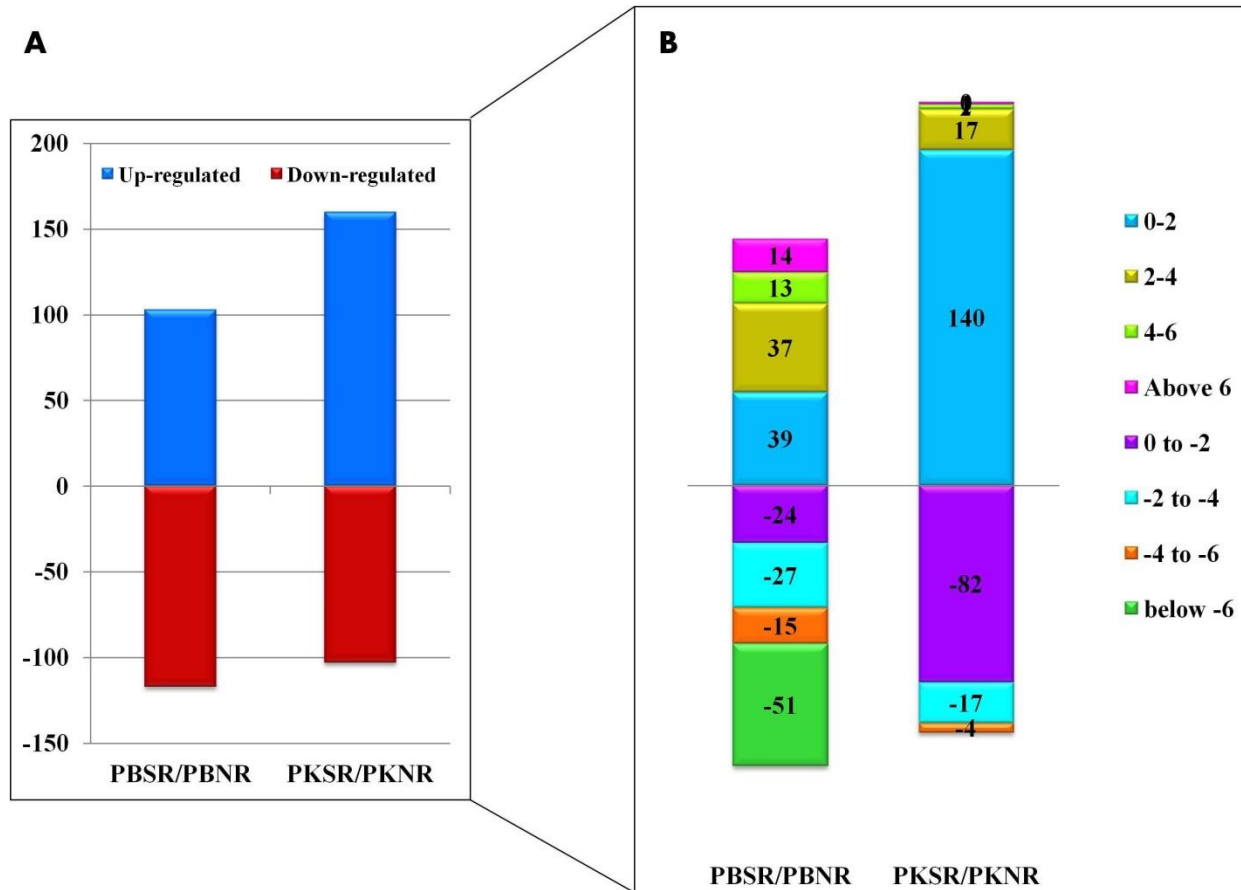

**Supplementary-File 1B: Graphical representation of the overall de-regulated miRs: (A)** Differential expression of miRs in PB and PK root tissues. **(B) Fold change expression of miRs** in Pusa Basmati (PBNR, PBSR) and Pokkali (PKNR, PKSR).
